# Supplementary material for: Antimicrobial use in a pediatric hospital in Kenya: a point prevalence survey to inform antimicrobial stewardship
Source: Frontiers journal article supplement (doi:10.3389/fitd.2025.1497199), 2025-03-05
Supplement: Supplementary_file_2.docx [file Supplementary_file_2.docx]

| **Antimicrobial molecule** | **Total number of prescribing encounters (percentage of total)** | **Number of prescribing encounters (percentage [%] of total antimicrobials prescribed) by ward** | | | | | |
| --- | --- | --- | --- | --- | --- | --- | --- |
| **Jacaranda Ward** | **Jean Ward** | **Felicity Ward** | **Paediatric Critical Care Unit** | **Surgical Ward** | **Casualty** |
| Azithromycin | 2 (4%) | 1 (7%) | - | - | 1 (25%) | - | - |
| Ceftazidime | 1 (2%) | - | - | - | - | 1 (14%) | - |
| Ceftriaxone | 9 (18%) | 1 (7%) | 3 (33%) | 4 (25%) | 1 (25%) | - | - |
| Sulfamethoxazole/  Trimethoprim | 1 (2%) | 1 (7%) | - | - | - | - | - |
| Flucloxacillin | 1 (2%) | - | - | 1 (6%) | - | - | - |
| Metronidazole | 6 (12%) | 3 (21%) | - | 2 (13%) | - | 1 (14%) | - |
| Piperacillin/ Tazobactam | 2 (4%) | 1 (7%) | - | - | 1 (25%) | - | - |
| Acyclovir | 2 (4%) | 1 (7%) | - | 1 (6%) | - | - | - |
| Amoxicillin | 1 (2%) | - | - | 1 (6%) | - | - | - |
| Amoxicillin/ Clavulanic acid | 8 (16%) | 1 (7%) | - | 3 (19%) | - | 3 (43%) | 1 (100%) |
| Artesunate | 1 (2%) | - | 1 (11%) | - | - | - | - |
| Benzylpenicillin | 1 (2%) | - | - | - | - | 1 (14%) | - |
| Cefotaxime | 1 (2%) | - | - | 1 (6%) | - | - | - |
| Cefuroxime | 3 (6%) | 1 (7%) | 1 (11%) | 1 (6%) | - | - | - |
| Metronidazole/ Diloxanide | 1 (2%) | - | 1 (11%) | - | - | - | - |
| Fluconazole | 3 (6%) | 1 (7%) | 1 (11%) | 1 (6%) | - | - | - |
| Gentamicin | 2 (4%) | - | - | - | 1 (25%) | 1 (14%) | - |
| Isoniazid | 2 (4%) | 1 (7%) | 1 (11%) | - | - | - | - |
| Meropenem | 1 (2%) | - | 1 (11%) | - | - | - | - |
| Micafungin | 1 (2%) | 1 (7%) | - | - | - | - | - |
| Vancomycin | 2 (4%) | 1 (7%) | - | 1 (6%) | - | - | - |

**Annex 2: Table showing a summary of antimicrobial prescribing encounters for each antimicrobial molecule, disaggregated by ward/speciality.**
